# Supplementary material for: Racehorses from a breeding farm in Tropical Ecuador have a high seroprevalence of anti-Leptospira spp. antibodies: a paradigm for leptospirosis management from a One Health perspective
Source: Frontiers journal article supplement (doi:10.3389/fitd.2023.1061038), 2023-05-09
Supplement: Table_2.XLSX [file Table_2.XLSX]

## Sheet: Hoja1
		Name	Age / years	Origin	Birth	Sex	Feeding
		Colizeo	NO DATA	USA	NO DATA	Male	Balanceado + pasto de corte
		Express news	9	USA	2007	Male	Balanceado + pasto de corte
		Precursor	9	USA	2007	Male	Balanceado + pasto de corte
		Platinum couple	11	USA	2005	Male	Balanceado + pasto de corte
		Golden itiz	NO DATA	USA	NO DATA	Male	Balanceado + pasto de corte
		Suntee	NO DATA	USA	NO DATA	Male	Balanceado + pasto de corte
		Vindobona hijo	NO DATA	NO DATA	NO DATA	Male	Balanceado + pasto de corte
		Aspirina	20	Ecuador	1996	Female	animal feed + cut grass
		Azarenka	5	Ecuador	2011	Female	animal feed + cut grass
		Baladan	15	Peru	2001	Female	animal feed + cut grass
		Bien parada	5	Ecuador	2011	Female	animal feed + cut grass
		Blue moon	9	Ecuador	2007	Female	animal feed + cut grass
		Blue news	6	Ecuador	2010	Female	animal feed + cut grass
		Canchera	7	Peru	2009	Female	animal feed + cut grass
		Coffee run	9	USA	2007	Female	animal feed + cut grass
		Copa rota	12	Ecuador	2004	Female	animal feed + cut grass
		Cosa nostra	15	Ecuador	2001	Female	animal feed + cut grass
		Dime que no	14	Ecuador	2002	Female	animal feed + cut grass
		Dime que si	13	Ecuador	2003	Female	animal feed + cut grass
		Dominguera	10	Peru	2006	Female	animal feed + cut grass
		Escarlata	16	Ecuador	2000	Female	animal feed + cut grass
		Exigencia	14	Ecuador	2002	Female	animal feed + cut grass
		Forastera	7	USA	2009	Female	animal feed + cut grass
		Gitana infiel	11	Chile	2005	Female	animal feed + cut grass
		Hermana luna	17	Ecuador	1999	Female	animal feed + cut grass
		Ironia	17	Peru	1999	Female	animal feed + cut grass
		Kaleidoscope sky	10	USA	2006	Female	animal feed + cut grass
		Locatelli	7	Ecuador	2009	Female	animal feed + cut grass
		Mamba negra	11	Ecuador	2005	Female	animal feed + cut grass
		Minerva	21	USA	1995	Female	animal feed + cut grass
		Mia paola	10	Peru	2006	Female	animal feed + cut grass
		Mossala	21	USA	1995	Female	animal feed + cut grass
		No me digas	7	Ecuador	2009	Female	animal feed + cut grass
		No se vende	6	Ecuador	2010	Female	animal feed + cut grass
		Otra ilusion	13	Peru	2003	Female	animal feed + cut grass
		Patada	11	Ecuador	2005	Female	animal feed + cut grass
		Pareja negra	22	USA	1994	Female	animal feed + cut grass
		Porcelana	12	USA	2004	Female	animal feed + cut grass
		Ranchera	18	Ecuador	1998	Female	animal feed + cut grass
		Recuerdos	16	Ecuador	2000	Female	animal feed + cut grass
		Samoana	7	USA	2009	Female	animal feed + cut grass
		Selena	17	Ecuador	1999	Female	animal feed + cut grass
		Sinfonia	15	Ecuador	2001	Female	animal feed + cut grass
		Sierrita	7	Ecuador	2009	Female	animal feed + cut grass
		Seleey	23	USA	1993	Female	animal feed + cut grass
		Spirited women	10	USA	2006	Female	animal feed + cut grass
		Tassina	20	USA	1996	Female	animal feed + cut grass
		Terapia	10	Ecuador	2006	Female	animal feed + cut grass
		Texas girl	8	Ecuador	2008	Female	animal feed + cut grass
		Tormenta	17	Peru	1999	Female	animal feed + cut grass
		Tofi	13	Ecuador	2003	Female	animal feed + cut grass
		Trinitaria	17	Peru	1999	Female	animal feed + cut grass
		Unusually black	10	USA	2006	Female	animal feed + cut grass
		Valkiria	10	Peru	2006	Female	animal feed + cut grass
		Valerosa	19	Argentina	1997	Female	animal feed + cut grass
		Vencedora girl	8	USA	2008	Female	animal feed + cut grass
		Vindobona	15	USA	2001	Female	animal feed + cut grass
		Wire transfer	19	Ecuador	1997	Female	animal feed + cut grass
		Vuela vuela	20	NO DATA	1996	Female	animal feed + cut grass
		Carla	NO DATA	USA	NO DATA	Female	animal feed + cut grass
		Binky	NO DATA	Chile	NO DATA	Female	animal feed + cut grass
		Villa sabona	NO DATA	Ecuador	NO DATA	Female	animal feed + cut grass
		Susie	NO DATA	Ecuador	NO DATA	Female	animal feed + cut grass
		Pepa pepona	NO DATA	Ecuador	NO DATA	Female	animal feed + cut grass
		Perfect swell	NO DATA	USA	NO DATA	Female	animal feed + cut grass
		Piroplasma	NO DATA	Ecuador	NO DATA	Female	animal feed + cut grass
		Pompeya	NO DATA	Ecuador	NO DATA	Female	animal feed + cut grass
		Polipockey	NO DATA	Ecuador	NO DATA	Female	animal feed + cut grass
		Macanuda	NO DATA	USA	NO DATA	Female	animal feed + cut grass
		Madre selva	NO DATA	Ecuador	NO DATA	Female	animal feed + cut grass
		Lady cielo	NO DATA	Ecuador	NO DATA	Female	animal feed + cut grass
		Omara	NO DATA	Peru	NO DATA	Female	animal feed + cut grass
		Jade porteña	NO DATA	Chile	NO DATA	Female	animal feed + cut grass
		Jerezana	NO DATA	USA	NO DATA	Female	animal feed + cut grass
		Fanatica	NO DATA	Peru	NO DATA	Female	animal feed + cut grass
		Felina	NO DATA	Peru	NO DATA	Female	animal feed + cut grass
		Crica va	NO DATA	Chile	NO DATA	Female	animal feed + cut grass
		Fueshte	NO DATA	Ecuador	NO DATA	Female	animal feed + cut grass
		Zamacueca	NO DATA	NO DATA	NO DATA	Female	animal feed + cut grass
		Ballerina	NO DATA	NO DATA	NO DATA	Female	animal feed + cut grass
		Hija polipockey	NO DATA	NO DATA	NO DATA	Female	animal feed + cut grass
		Playa rosa	NO DATA	NO DATA	NO DATA	Female	animal feed + cut grass
		Aminta	NO DATA	NO DATA	NO DATA	Female	animal feed + cut grass
		Baya	NO DATA	NO DATA	NO DATA	Female	animal feed + cut grass
		Florita	NO DATA	NO DATA	NO DATA	Female	animal feed + cut grass
		La china	NO DATA	NO DATA	NO DATA	Female	animal feed + cut grass
		Iris chacon	NO DATA	NO DATA	NO DATA	Female	animal feed + cut grass
		Pintada	NO DATA	NO DATA	NO DATA	Female	animal feed + cut grass
		Pata negra	NO DATA	NO DATA	NO DATA	Female	animal feed + cut grass
		Pata blanca	NO DATA	NO DATA	NO DATA	Female	animal feed + cut grass
		Sharmuta	NO DATA	NO DATA	NO DATA	Female	animal feed + cut grass
		Sola	NO DATA	NO DATA	NO DATA	Female	animal feed + cut grass
		Blue silver	NO DATA	NO DATA	NO DATA	Female	animal feed + cut grass
		Matina	NO DATA	NO DATA	NO DATA	Female	animal feed + cut grass
		Wind and sea	NO DATA	NO DATA	NO DATA	Female	animal feed + cut grass
		Felisa	NO DATA	NO DATA	NO DATA	Female	animal feed + cut grass
		Laila	NO DATA	NO DATA	NO DATA	Female	animal feed + cut grass
